# Supplementary material
Source: PubMed Central journal article supplement (PMC4248877)
Supplement: JB.01966-14_zjb999093376so1.pdf [file JB.01966-14_zjb999093376so1.pdf]

## Supplementary information

**Table S1:** Oligonucleotides used in this study

| Name | Sequence (5'-3')                  |
|------|-----------------------------------|
| P125 | GTAATGCGCACTAGGAAC                |
| P126 | GTGGCGCGGCATTATGTTG               |
| P127 | CGCCATTATGTTACGGGCTCACTC          |
| P128 | GATAATACGCATTAAGGCGGTATGTC        |
| P142 | CGGCTCGAGCGCGCGTAATACGACTCAC      |
| P143 | CGGCTCGAGCCTGTGACGGAAGATCACTTCGC  |
| P154 | GCCTCGAGAAGCTGATGACTGCGGCGGACG    |
| P155 | GCCTCGAGCAAAGCCACCGTACTAAACC      |
| P156 | CGATATCGCTAGCTCGAGC               |
| P157 | CCGATGCATCTCAGTCCTGCTCCTCGGCC     |
| P158 | GCCGAATTCGCTATGACCATGATTACGAATTCG |
| P159 | GCCTACACCCGGGTTACTTG              |
| P160 | GGCCTGCAGATGACCATGATTACGGATTAC    |
| P161 | AATGCAGCTGGCACGACAGG              |
| P162 | GCCATGCATTGAATTACAACAGTACTGCG     |
| P163 | CCGTCGCGACCATTTTAGCTTCCTTAGCTCC   |
| P226 | CCGAATTCACCATGAGTAAAGGAGAAGAAC    |
| P227 | CCGAGCTCTTATTTGTATAGTTCATCC       |

**Figure S1.**

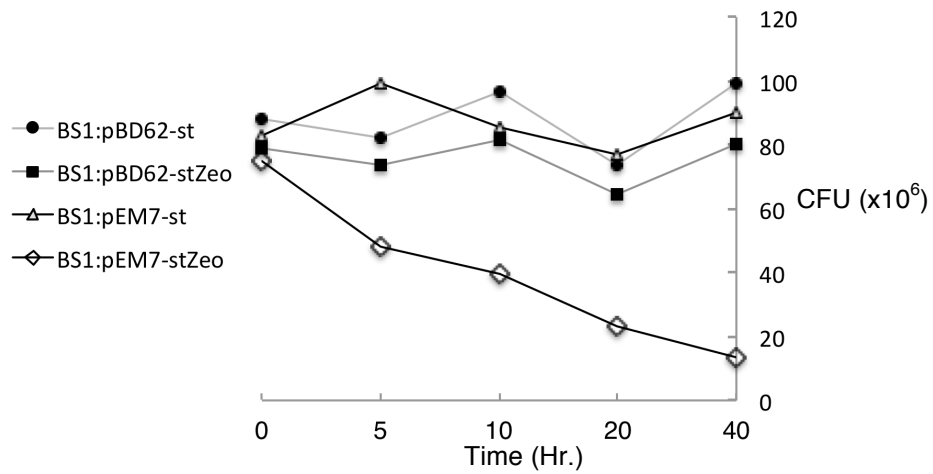

**Figure S1.** Loss of Zeocin resistance in *V. cholerae* cells carrying autonomously replicating or integrated plasmid. Cells were continuously grown in rich medium at 37°C with shaking for 40 hrs without any selection and resistance were detected by plating cells onto LA medium supplemented with streptomycin and Zeocin. Average values from two independent experiments were reported.
